# Supplementary material for: Reciprocal longitudinal effects between sense of school belonging and academic achievement: quasi-experimental estimates using United States primary school data
Source: Frontiers journal article supplement (doi:10.3389/fpsyg.2024.1478320), 2025-02-14
Supplement: Presentation_1.pdf [file Presentation_1.pdf]

## Supplementary Materials for:

### Reciprocal longitudinal effects between sense of school belonging and academic achievement: Quasi-experimental estimates using US primary school data

Chris Sakellariou  
Nanyang Technological University, Singapore  
acsake@ntu.edu.sg

## APPENDIX TABLES AND CHARTS

Table A1: From Social Integration in School to Achievement: First-Stage IV Estimates

| Sense of School Belonging at grade 4 (stand.)  | READING               |                       | MATHEMATICS           |                       |
|------------------------------------------------|-----------------------|-----------------------|-----------------------|-----------------------|
|                                                | MALE                  | FEMALE                | MALE                  | FEMALE                |
| <i>Sensitive to others' feelings</i>           | <b>0.184</b> (0.021)  | <b>0.131</b> (0.029)  | <b>0.185</b> (0.021)  | <b>0.132</b> (0.029)  |
| <i>Respects others' property</i>               | <b>0.137</b> (0.028)  | <b>0.144</b> (0.043)  | <b>0.136</b> (0.028)  | <b>0.145</b> (0.043)  |
| Race/Ethnicity: Black                          | <b>0.216</b> (0.065)  | 0.078 (0.079)         | <b>0.223</b> (0.064)  | 0.078 (0.079)         |
| Race/Ethnicity: Hispanic                       | 0.052 (0.053)         | <b>0.133</b> (0.052)  | 0.054 (0.053)         | <b>0.136</b> (0.052)  |
| Race/Ethnicity: Asian                          | -0.009 (0.078)        | -0.115 (0.108)        | -0.008 (0.079)        | -0.115 (0.108)        |
| Race/Ethnicity: Native American                | -0.017 (0.115)        | 0.059 (0.148)         | -0.015 (0.117)        | 0.058 (0.148)         |
| Mixed Race/Ethnicity                           | 0.099 (0.097)         | -0.163 (0.100)        | 0.100 (0.096)         | -0.164 (0.100)        |
| Suburb school (vs. City)                       | -0.021 (0.041)        | 0.038 (0.039)         | -0.014 (0.042)        | 0.036 (0.039)         |
| Town school (vs. City)                         | -0.033 (0.057)        | <b>-0.175</b> (0.065) | -0.027 (0.057)        | <b>-0.178</b> (0.065) |
| Rural school (vs. city)                        | <b>-0.204</b> (0.069) | <b>-0.131</b> (0.054) | <b>0.200</b> (0.069)  | <b>-0.133</b> (0.055) |
| Number of siblings                             | 0.027 (0.015)         | -0.002 (0.017)        | 0.028 (0.015)         | -0.001 (0.017)        |
| Has disability                                 | <b>-0.223</b> (0.054) | <b>-0.342</b> (0.059) | <b>-0.223</b> (0.053) | <b>-0.342</b> (0.059) |
| SES (stand. index)                             | 0.039 (0.027)         | <b>0.107</b> (0.029)  | 0.039 (0.027)         | <b>0.106</b> (0.029)  |
| Catholic school (vs. public)                   | -0.005 (0.087)        | -0.088 (0.063)        | -0.006 (0.087)        | -0.089 (0.063)        |
| Other private (vs. public)                     | <b>-0.218</b> (0.087) | -0.107 (0.104)        | <b>-0.218</b> (0.087) | -0.107 (0.104)        |
| 25-50% non-White (vs. 0-25%)                   | <b>-0.156</b> (0.057) | <b>-0.137</b> (0.053) | <b>-0.157</b> (0.057) | <b>-0.138</b> (0.053) |
| 50-75% non-White (vs. 0-25%)                   | <b>-0.286</b> (0.059) | <b>-0.117</b> (0.059) | <b>-0.282</b> (0.058) | <b>-0.115</b> (0.059) |
| > 75% non-White (vs. 0-25%)                    | <b>-0.286</b> (0.076) | <b>-0.167</b> (0.056) | <b>-0.285</b> (0.075) | <b>-0.171</b> (0.056) |
| School problems (stand. index)                 | <b>0.039</b> (0.018)  | <b>0.050</b> (0.019)  | <b>0.041</b> (0.018)  | <b>0.050</b> (0.019)  |
| Numbers Reversed ability score at kindergarten | <b>0.062</b> (0.018)  | <b>0.099</b> (0.021)  | <b>0.062</b> (0.018)  | <b>0.098</b> (0.021)  |
| Constant                                       | <b>-1.42</b> (0.286)  | <b>-2.02</b> (0.326)  | <b>-1.41</b> (0.282)  | <b>-2.01</b> (0.325)  |
| R <sup>2</sup>                                 | 0.095                 | 0.090                 | 0.095                 | 0.090                 |
| F-statistic [p-value]                          | 19.4 [0.000]          | 18.1 [0.000]          | 19.9 [0.000]          | 18.3 [0.000]          |
| N                                              | 4,053                 | 3,970                 | 4,052                 | 3,969                 |

Notes: The model controls for grade 5 school fixed effects. Standard errors derived using 80 Jackknife replication weights in parentheses. Bold indicates statistical significance at the 5% level or lower.

Table A2: From Achievement to Social Integration in School: First-Stage IV Estimates

| IRT Scale Score at grade 4 (stand.)                   | READING               |                       | MATHEMATICS           |                       |
|-------------------------------------------------------|-----------------------|-----------------------|-----------------------|-----------------------|
|                                                       | MALE                  | FEMALE                | MALE                  | FEMALE                |
| <i>Numbers Reversed ability score at kindergarten</i> | <b>0.376</b> (0.021)  | <b>0.317</b> (0.017)  | <b>0.343</b> (0.017)  | <b>0.344</b> (0.018)  |
| <i>Dimensional Change Card Sort at kindergarten</i>   | <b>0.083</b> (0.011)  | <b>0.078</b> (0.010)  | <b>0.085</b> (0.010)  | <b>0.077</b> (0.010)  |
| Race/Ethnicity: Black                                 | -0.073 (0.056)        | -0.070 (0.052)        | <b>-0.427</b> (0.076) | <b>-0.420</b> (0.071) |
| Race/Ethnicity: Hispanic                              | -0.080 (0.057)        | 0.000 (0.034)         | <b>-0.160</b> (0.055) | -0.033 (0.047)        |
| Race/Ethnicity: Asian                                 | 0.160 (0.102)         | <b>0.214</b> (0.049)  | 0.159 (0.107)         | <b>0.329</b> (0.053)  |
| Race/Ethnicity: Native American                       | <b>-0.331</b> (0.088) | -0.001 (0.155)        | -0.188 (0.136)        | -0.030 (0.079)        |
| Mixed Race/Ethnicity                                  | <b>0.185</b> (0.064)  | 0.076 (0.065)         | -0.032 (0.068)        | 0.019 (0.064)         |
| Suburb school (vs. City)                              | -0.019 (0.036)        | -0.013 (0.040)        | -0.036 (0.038)        | 0.048 (0.039)         |
| Town school (vs. City)                                | 0.055 (0.073)         | -0.091 (0.068)        | 0.042 (0.055)         | -0.093 (0.066)        |
| Rural school (vs. city)                               | <b>-0.167</b> (0.049) | -0.047 (0.052)        | -0.063 (0.044)        | -0.023 (0.051)        |
| Number of siblings                                    | <b>-0.038</b> (0.018) | <b>-0.071</b> (0.013) | -0.014 (0.015)        | -0.019 (0.013)        |
| Has disability                                        | <b>-0.376</b> (0.052) | <b>-0.396</b> (0.044) | <b>-0.406</b> (0.045) | <b>-0.352</b> (0.051) |
| SES (stand. index)                                    | <b>0.240</b> (0.024)  | <b>0.258</b> (0.020)  | <b>0.229</b> (0.029)  | <b>0.233</b> (0.020)  |
| Catholic school (vs. public)                          | -0.047 (0.061)        | -0.001 (0.048)        | -0.059 (0.068)        | -0.097 (0.063)        |
| Other private (vs. public)                            | <b>-0.154</b> (0.060) | -0.043 (0.062)        | <b>-0.209</b> (0.070) | <b>-0.198</b> (0.062) |
| 25-50% non-White (vs. 0-25%)                          | 0.039 (0.040)         | 0.068 (0.037)         | -0.037 (0.052)        | 0.001 (0.046)         |
| 50-75% non-White (vs. 0-25%)                          | <b>-0.139</b> (0.068) | -0.031 (0.055)        | -0.094 (0.050)        | -0.030 (0.053)        |
| > 75% non-White (vs. 0-25%)                           | -0.114 (0.069)        | -0.100 (0.055)        | <b>-0.142</b> (0.055) | -0.121 (0.064)        |
| School problems (stand. index)                        | 0.032 (0.017)         | 0.022 (0.017)         | 0.000 (0.016)         | -0.005 (0.016)        |
| Social Skills at kindergarten (Teacher-rated)         | <b>0.154</b> (0.026)  | <b>0.081</b> (0.027)  | <b>0.154</b> (0.022)  | <b>0.096</b> (0.028)  |
| Constant                                              | <b>-1.00</b> (0.136)  | <b>-0.718</b> (0.147) | <b>-0.820</b> (0.130) | <b>-0.840</b> (0.154) |
| R <sup>2</sup>                                        | 0.387                 | 0.372                 | 0.429                 | 0.384                 |
| F-statistic [p-value]                                 | 104.5 [0.000]         | 131.7 [0.000]         | 99.2 [0.000]          | 81.5 [0.000]          |
| N                                                     | 3,449                 | 3,494                 | 3,449                 | 3,494                 |

Notes: The model controls for grade 5 school fixed effects. Standard errors derived using 80 Jackknife replication weights in parentheses. Bold indicates statistical significance at the 5% level or lower.

Table A3: From Grade 4 Social Integration to Grade 5 achievement – Using one instrument at a time

| Outcome: Grade 5 IRT Scale Score (stand.)       | READING              |                      | MATHEMATICS          |                      |
|-------------------------------------------------|----------------------|----------------------|----------------------|----------------------|
|                                                 | MALE                 | FEMALE               | MALE                 | FEMALE               |
| Using ' <i>sensitive to others' feelings</i> ': |                      |                      |                      |                      |
| Grade 4: Sense of Social integration (stand.)   | <b>0.407</b> (0.085) | <b>0.582</b> (0.110) | <b>0.338</b> (0.079) | <b>0.560</b> (0.121) |
| Using ' <i>respects others' property</i> ':     |                      |                      |                      |                      |
| Grade 4: Sense of Social integration (stand.)   | <b>0.386</b> (0.106) | <b>0.559</b> (0.155) | <b>0.364</b> (0.115) | <b>0.529</b> (0.172) |

Table A4: From Grade 4 achievement to grade 5 Social Integration – Using only 'Card Sort' score

| Outcome: Grade 5 Sense of School Belonging (stand.) | READING       |               | MATHEMATICS   |               |
|-----------------------------------------------------|---------------|---------------|---------------|---------------|
|                                                     | MALE          | FEMALE        | MALE          | FEMALE        |
| Using ' <i>sensitive to others' feelings</i> ':     |               |               |               |               |
| Grade 5: Sense of IRT Scale Score (stand.)          | 0.179 (0.096) | 0.170 (0.109) | 0.182 (0.099) | 0.166 (0.106) |

Table A5a: Nevo and Rosen (2012) Imperfect IV Bounds – From School Belonging to Reading achievement

| Outcome: Reading score | Lower bound CI | Lower bound estimate | Upper bound estimate | Upper bound CI |
|------------------------|----------------|----------------------|----------------------|----------------|
| Males                  | [0.218         | (0.417               | 0.645)               | 1.69]          |
| Females                | [0.256         | (0.570               | 0.739)               | 1.99]          |

Table A5b: Nevo and Rosen (2012) Imperfect IV Bounds – From School Belonging to Math achievement

| Outcome: Math score | Lower bound CI | Lower bound estimate | Upper bound estimate | Upper bound CI |
|---------------------|----------------|----------------------|----------------------|----------------|
| Males               | [0.163         | (0.316               | 0.359)               | 1.12]          |
| Females             | [0.237         | (0.548               | 0.852)               | 2.16]          |

Table A6a: Nevo and Rosen (2012) Imperfect IV Bounds – From Reading achievement to School Belonging

| Outcome: Social Integration | Lower bound CI | Lower bound estimate | Upper bound estimate | Upper bound CI |
|-----------------------------|----------------|----------------------|----------------------|----------------|
| Males                       | [0.051         | (0.135               | 0.174)               | 0.243]         |
| Females                     | [0.051         | (0.194               | 0.213)               | 0.331]         |

Table A6b: Nevo and Rosen (2012) Imperfect IV Bounds – From Math achievement to School Belonging

| Outcome: Social Integration | Lower bound CI | Lower bound estimate | Upper bound estimate | Upper bound CI |
|-----------------------------|----------------|----------------------|----------------------|----------------|
| Males                       | [0.034         | (0.147               | 0.180)               | 0.264]         |
| Females                     | [0.048         | (0.178               | 0.195)               | 0.305]         |

Table A7a: Conley et al. (2012) Conservate CIs – From School Belonging to Reading achievement

| Outcome: Reading score | Lower bound CI | Coeff. Estimate | Upper bound CI |
|------------------------|----------------|-----------------|----------------|
| Males                  | [0.200         | (0.407)         | 0.614]         |
| Females                | [0.276         | (0.560)         | 0.850]         |

Table A7b: Conley et al. (2012) Conservate CIs – From School Belonging to Math achievement

| Outcome: Reading score | Lower bound CI | Coeff. Estimate | Upper bound CI |
|------------------------|----------------|-----------------|----------------|
| Males                  | [0.188         | (0.357)         | 0.526]         |
| Females                | [0.155         | (0.524)         | 0.894]         |

Table A8a: Conley et al. (2012) Conservate CIs – From Reading achievement to School Belonging

| Outcome: Reading score | Lower bound CI | Coeff. Estimate | Upper bound CI |
|------------------------|----------------|-----------------|----------------|
| Males                  | [0.037         | (0.191)         | 0.346]         |
| Females                | [0.001         | (0.154)         | 0.308]         |

Table A8b: Conley et al. (2012) Conservate CIs – From Math achievement to School Belonging

| Outcome: Reading score | Lower bound CI | Coeff. Estimate | Upper bound CI |
|------------------------|----------------|-----------------|----------------|
| Males                  | [0.062         | (0.190)         | 0.319]         |
| Females                | [0.023         | (0.153)         | 0.283]         |

Table A9a: From Grade 4 School belonging to Grade 5 achievement – Only exogenous covariates

| Outcome: Grade 5 IRT Scale Score (stand.)          | READING              |                      | MATHEMATICS          |                      |
|----------------------------------------------------|----------------------|----------------------|----------------------|----------------------|
|                                                    | MALE                 | FEMALE               | MALE                 | FEMALE               |
| Grade 4: Sense of Social integration (stand.)      | <b>0.424</b> (0.086) | <b>0.555</b> (0.108) | <b>0.376</b> (0.092) | <b>0.520</b> (0.119) |
| <u>Relevance of excluded instrument:</u>           |                      |                      |                      |                      |
| Shea Partial R-sq. of excluded instrument          | 0.044                | 0.025                | 0.044                | 0.025                |
| Montiel Olea – Pflueger weak instrument test:      |                      |                      |                      |                      |
| Effective F-statistic:                             | 66.5                 | 32.3                 | 66.1                 | 32.62                |
| Critical values for 5% worst-case bias:            | 7.03                 | 6.88                 | 7.00                 | 6.71                 |
| <u>Overidentification test of all instruments:</u> |                      |                      |                      |                      |
| Hansen's J statistic [p-value]                     | 0.006 [0.940]        | 0.084 [0.772]        | 0.078 [0.781]        | 0.438 [0.508]        |
| <u>Test of endogeneity of social integration:</u>  |                      |                      |                      |                      |
| Chi-sq. statistic [p-value]                        | 16.64 [0.000]        | 29.47 [0.000]        | 13.35 [0.000]        | 26.01 [0.000]        |
| N                                                  | 4,221                | 4,127                | 4,219                | 4,126                |

Notes: The model controls for grade 5 school fixed effects. Standard errors derived using 80 Jackknife replication weights in parentheses. Bold indicates statistical significance at the 5% level or lower.

Table A9b: From Grade 4 achievement to Grade 5 School belonging – Only exogenous covariates

| Outcome:                                           | READING              |                      | MATHEMATICS          |                      |
|----------------------------------------------------|----------------------|----------------------|----------------------|----------------------|
|                                                    | MALE                 | FEMALE               | MALE                 | FEMALE               |
| Grade 5: Sense of Social integration (stand.)      |                      |                      |                      |                      |
| Grade 4: IRT Scale Score (stand.)                  | <b>0.159</b> (0.047) | <b>0.174</b> (0.052) | <b>0.173</b> (0.051) | <b>0.158</b> (0.050) |
| <u>Relevance of excluded instrument:</u>           |                      |                      |                      |                      |
| Shea Partial R-sq. of excluded instrument          | 0.184                | 0.172                | 0.196                | 0.193                |
| Montiel Olea – Pflueger weak instrument test:      |                      |                      |                      |                      |
| Effective F-statistic:                             | 258.3                | 232.9                | 276.8                | 276.1                |
| Critical values for 5% worst-case bias:            | 7.52                 | 6.64                 | 8.15                 | 6.20                 |
| <u>Overidentification test of all instruments:</u> |                      |                      |                      |                      |
| Hansen's J statistic [p-value]                     | 0.024 [0.876]        | 0.004 [0.950]        | 0.002 [0.963]        | 0.032 [0.858]        |
| <u>Test of endogeneity of social integration:</u>  |                      |                      |                      |                      |
| Chi-sq. statistic [p-value]                        | 0.646 [0.422]        | 4.06 [0.044]         | 2.17 [0.141]         | 3.42 [0.064]         |
| N                                                  | 3,895                | 3,913                | 3,897                | 3,913                |

Notes: The model controls for grade 5 school fixed effects. Standard errors derived using 80 Jackknife replication weights in parentheses. Bold indicates statistical significance at the 5% level or lower.

**Graph 1: From Sense of School Belonging to Reading Scale score: Exclusion restriction tests**

**MALES**

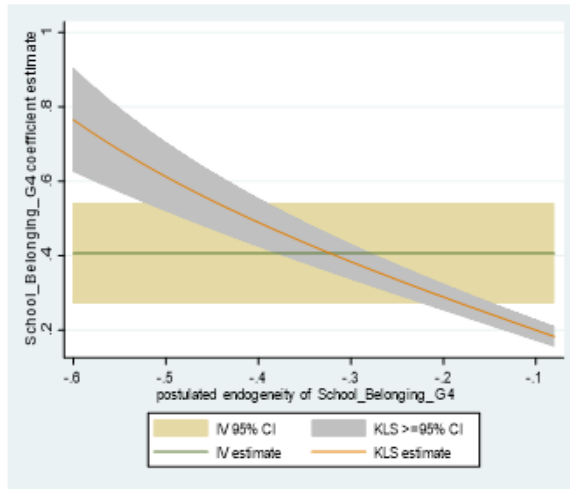

**FEMALES**

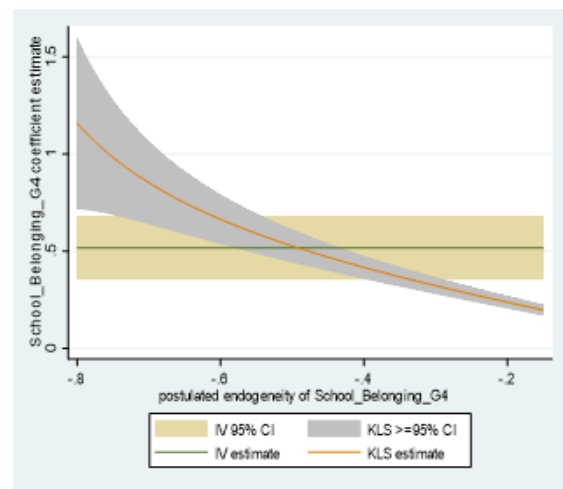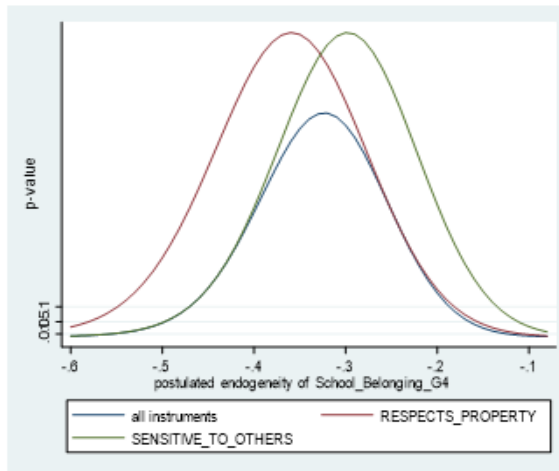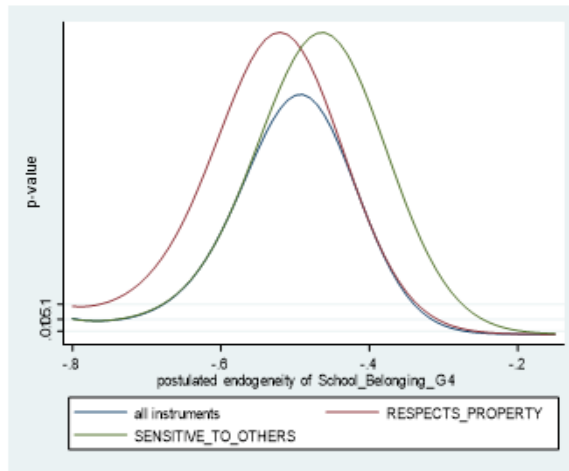

**Plausible endogeneity correlations: point estimate [95% CI]**

MALES: -0.30 [-0.42, -0.18]

FEMALES: -0.45 [-0.57, -0.32]

**Degree of endogeneity compatible with valid exclusion: point estimate [95% CI]**

Respects others' property:

MALES: -0.36 [-0.58, -0.16]

FEMALES: -0.52 [., -0.31]

Sensitive to others' feelings:

MALES: -0.30 [-0.50, -0.11]

FEMALES: -0.46 [-0.74, -0.25]

Combination of instruments:

MALES: -0.32 [-0.50, -0.15]

FEMALES: -0.49 [-0.80, -0.30]

**Graph 2: From Sense of School Belonging to Mathematics Scale score: Exclusion restriction tests**

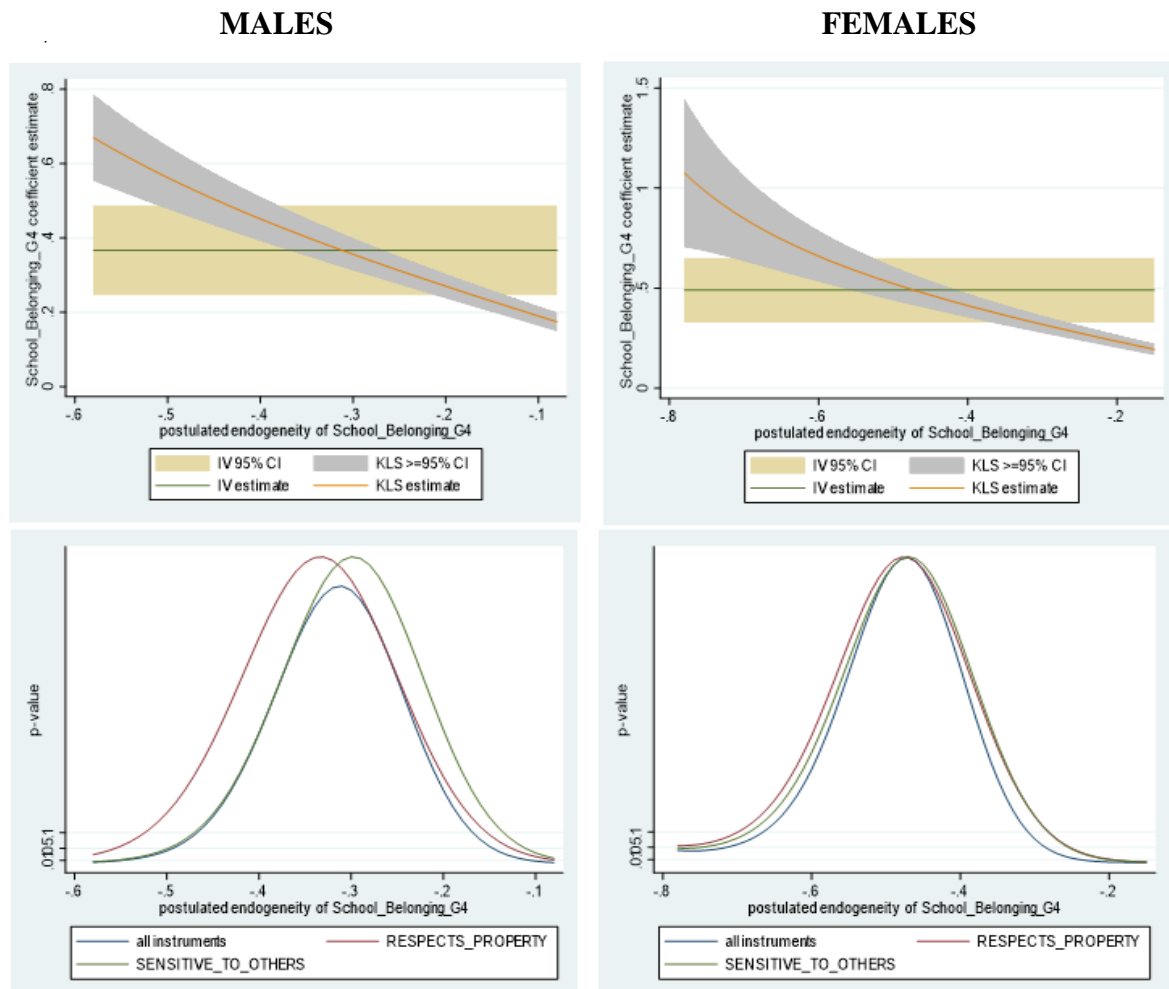

**Plausible endogeneity correlations: point estimate [95% CI]**

MALES: -0.29 [-0.42, -0.17]

FEMALES: -0.44 [-0.56, -0.30]

**Degree of endogeneity compatible with valid exclusion: point estimate [95% CI]**

*Respects others' property:*

MALES: -0.33 [-0.56, -0.13]

FEMALES: -0.48 [-0.77, -0.25]

*Sensitive to others' feelings:*

MALES: -0.30 [-0.50, -0.11]

FEMALES: -0.47 [-0.75, -0.25]

*Combination of instruments:*

MALES: -0.30 [-0.50, -0.12]

FEMALES: -0.48 [-0.74, -0.29]

**Graph 3: From Reading Scale score to Sense of School Belonging: Exclusion restriction tests**

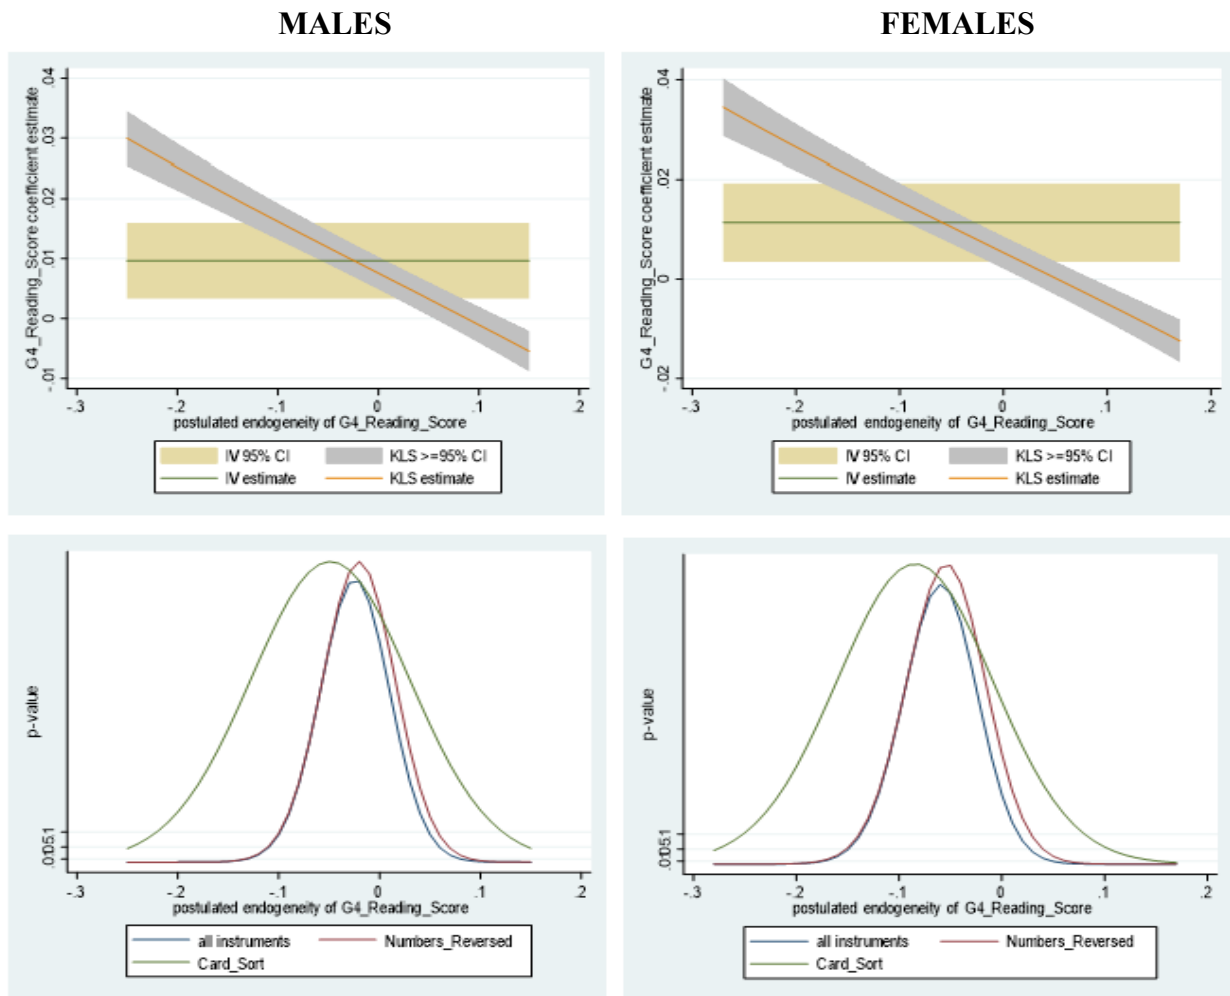

**Plausible endogeneity correlations: point estimate [95% CI]**

MALES: -0.025 [-0.095, 0.044]

FEMALES: -0.062 [-0.13, 0.01]

**Degree of endogeneity of instrument compatible with valid exclusion: point estimate 95% CI**

Number Reversed score:

MALES: -0.020 [95% CI: -0.11, 0.069]

FEMALES: -0.053 [95% CI: -0.15, 0.040]

Dimensional Change Card Sort:

MALES: -0.05 [95% CI: -0.22, 0.15]

FEMALES: -0.084 [95% CI: -0.28, 0.10]

Combination of instruments:

MALES: -0.02 [-0.11, -0.05]

FEMALES: -0.04 [-0.15, 0.02]



**Graph 4: From Mathematics Scale score to Sense of School Belonging: Exclusion restriction tests**

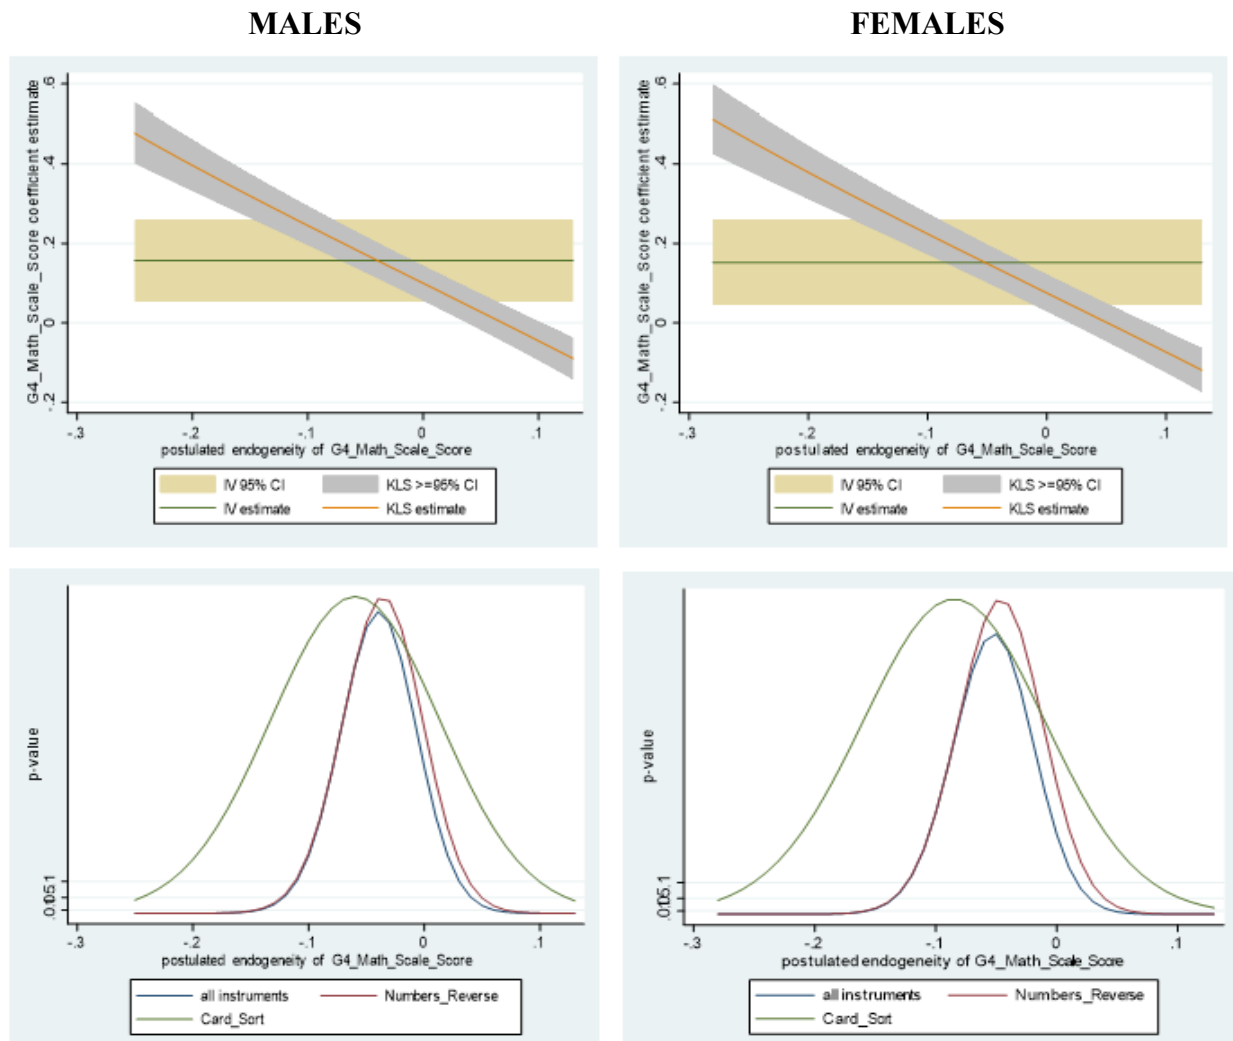

**Plausible endogeneity correlations: point estimate [95% CI]**

MALES: -0.042 [-0.11, 0.026]

FEMALES: -0.057 [-0.13, 0.012]

**Degree of endogeneity of instrument compatible with valid exclusion: point estimate 95% CI**

Number Reversed score:

MALES: -0.036 [95% CI: -0.12, 0.049]

FEMALES: -0.048 [95% CI: -0.14, 0.039]

Dimensional Change Card Sort:

MALES: -0.06 [95% CI: -0.24, 0.12]

FEMALES: -0.085 [95% CI: -0.28, 0.10]

Combination of instruments:

MALES: -0.045 [-0.11, 0.03]

FEMALES: -0.05 [-0.13, 0.025]
